# Supplementary material
Source: Springer Nature journal article supplement (https://www.springermedizin.de/resource/supplementary/13054_2010_8594_MOESM6_ESM.pdf/9732322)

**Changes in gas volume in poorly/nonaerated lung regions between day 7 and baseline (ml)**

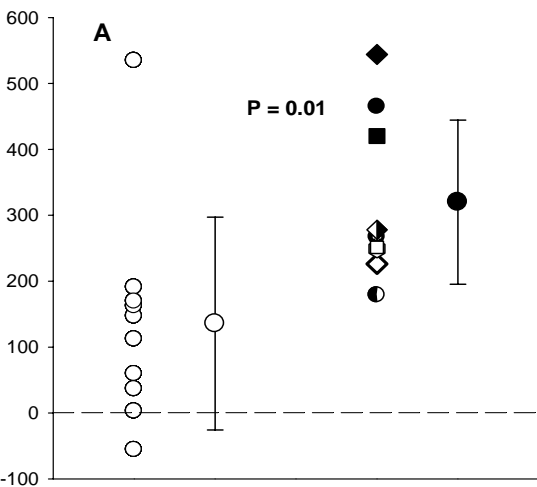

**Changes in tissue volume in poorly/nonaerated lung regions between day 7 and baseline (ml)**

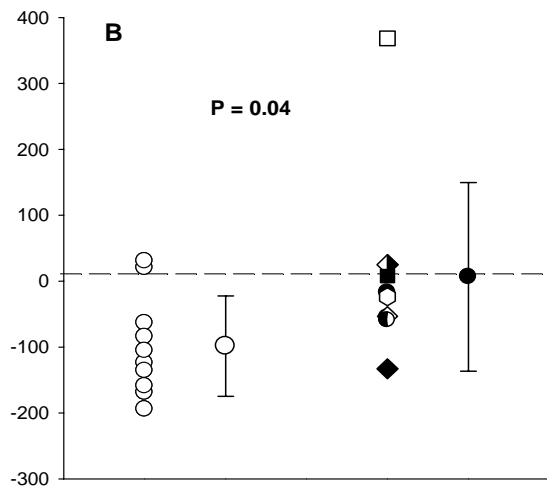

**Changes in gas volume in normally aerated lung regions between day 7 and baseline (ml)**

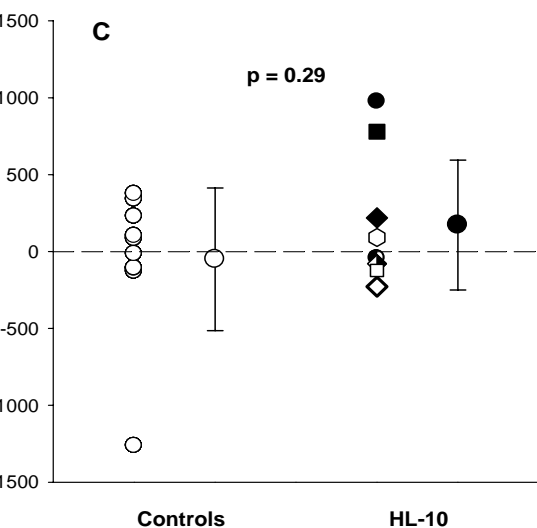

**Changes in tissue volume in normally aerated lung regions between day 7 and baseline (ml)**

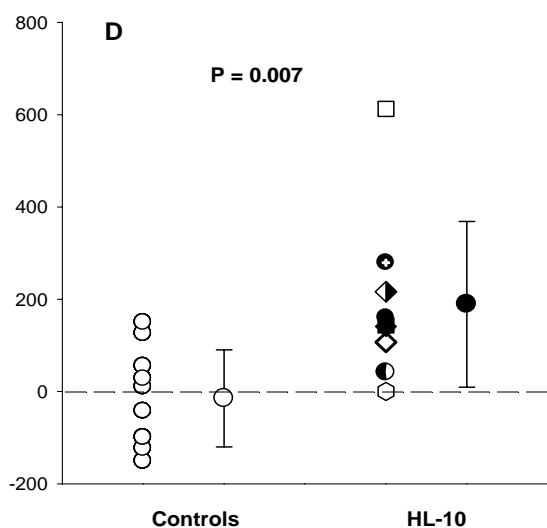

Supplement: MOESM6 [file 9732322]
